# Supplementary material for: Comprehensive profiles and diagnostic value of menopausal-specific gut microbiota in premenopausal breast cancer
Source: PubMed Central journal article supplement (PMC8569190; doi:10.1038/s12276-021-00686-9), 2021-10-27
Supplement: 12276_2021_686_MOESM1_ESM.pdf [file 12276_2021_686_MOESM1_ESM.pdf]

1 **Supplementary Information**

2

3 **Supplementary Figure 1** Microbial markers in patients with different receptor statuses of  
4 breast cancer. The 13 bacterial taxa did not show a significant trend among the different  
5 receptor statuses (luminal, HER2, basal), with only a small proportion of bacterial taxa  
6 showing statistical significance.

7

8 **Supplementary Figure 2** Microbial markers in the different stages of breast cancer. The 13  
9 bacterial taxa did not show a significant trend among the different stages (stage 1, 2) with  
10 only a small proportion of bacterial taxa displaying statistical significance.

11

12

13

14

15

16

17

18

19

20

21

22

23

24

25

26

# Supplementary Fig. 1

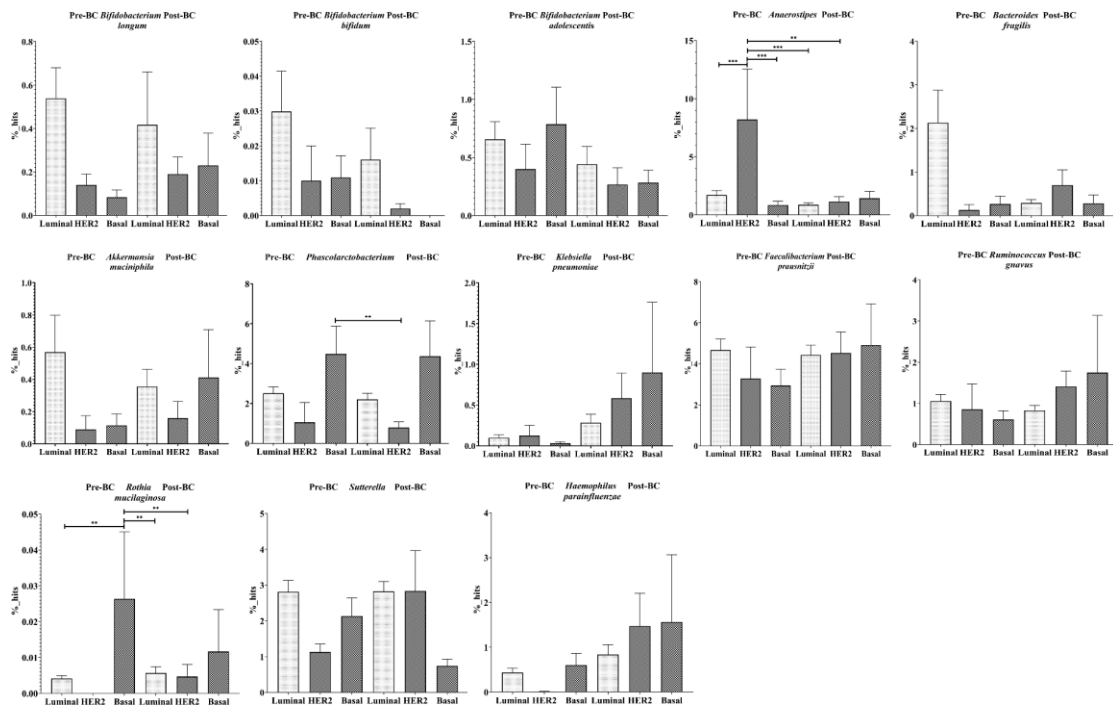

27

28

29

30

31

32

33

34

35

36

37

38

39

40

41

42

## Supplementary Fig. 2

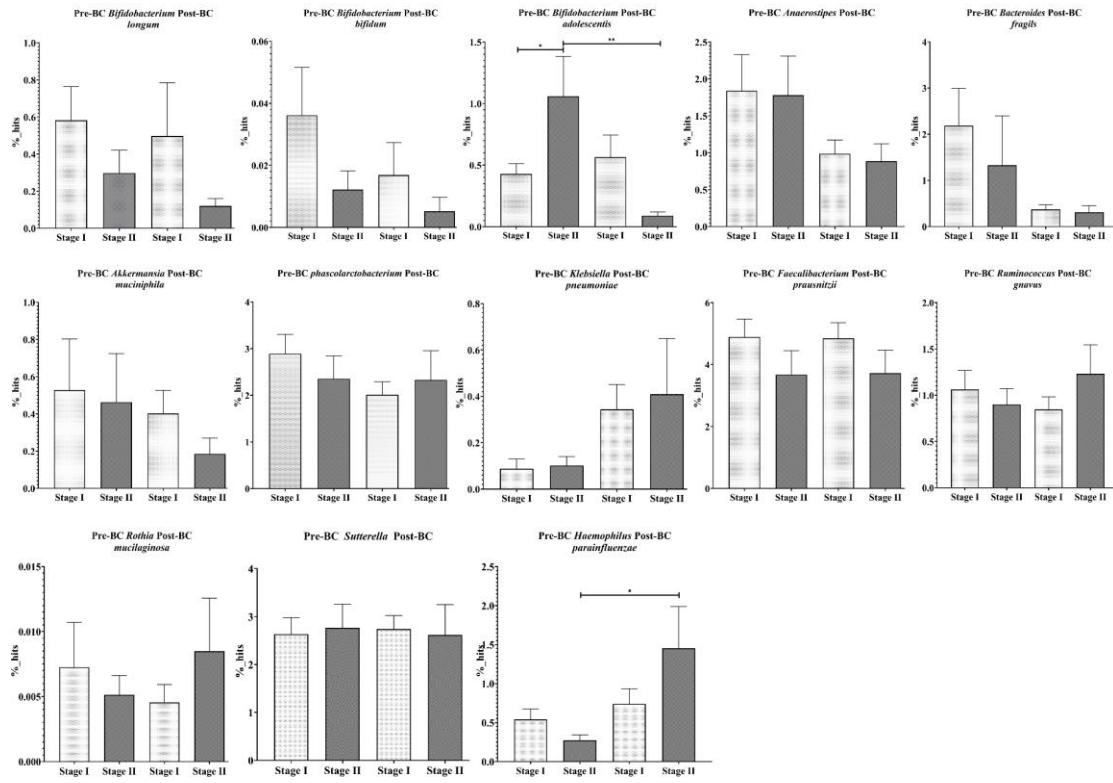

43

44
